# Supplementary material for: Phylogeny of Trachelomonas and Strombomonas (Euglenaceae) Based on Morphological and Molecular Data
Source: MDPI journal article supplement (doi:10.3390/d14080623), 2022-08-05
Supplement: s1 [file s1]

Archive with 3 entries (3 files):
- Figure S1.pdf
- Table S1.pdf
- Table S2.pdf
