# Supplementary material for: Phylogeny of Trachelomonas and Strombomonas (Euglenaceae) Based on Morphological and Molecular Data
Source: MDPI journal article supplement (doi:10.3390/d14080623), 2022-08-05
Supplement: s1 [file s1]

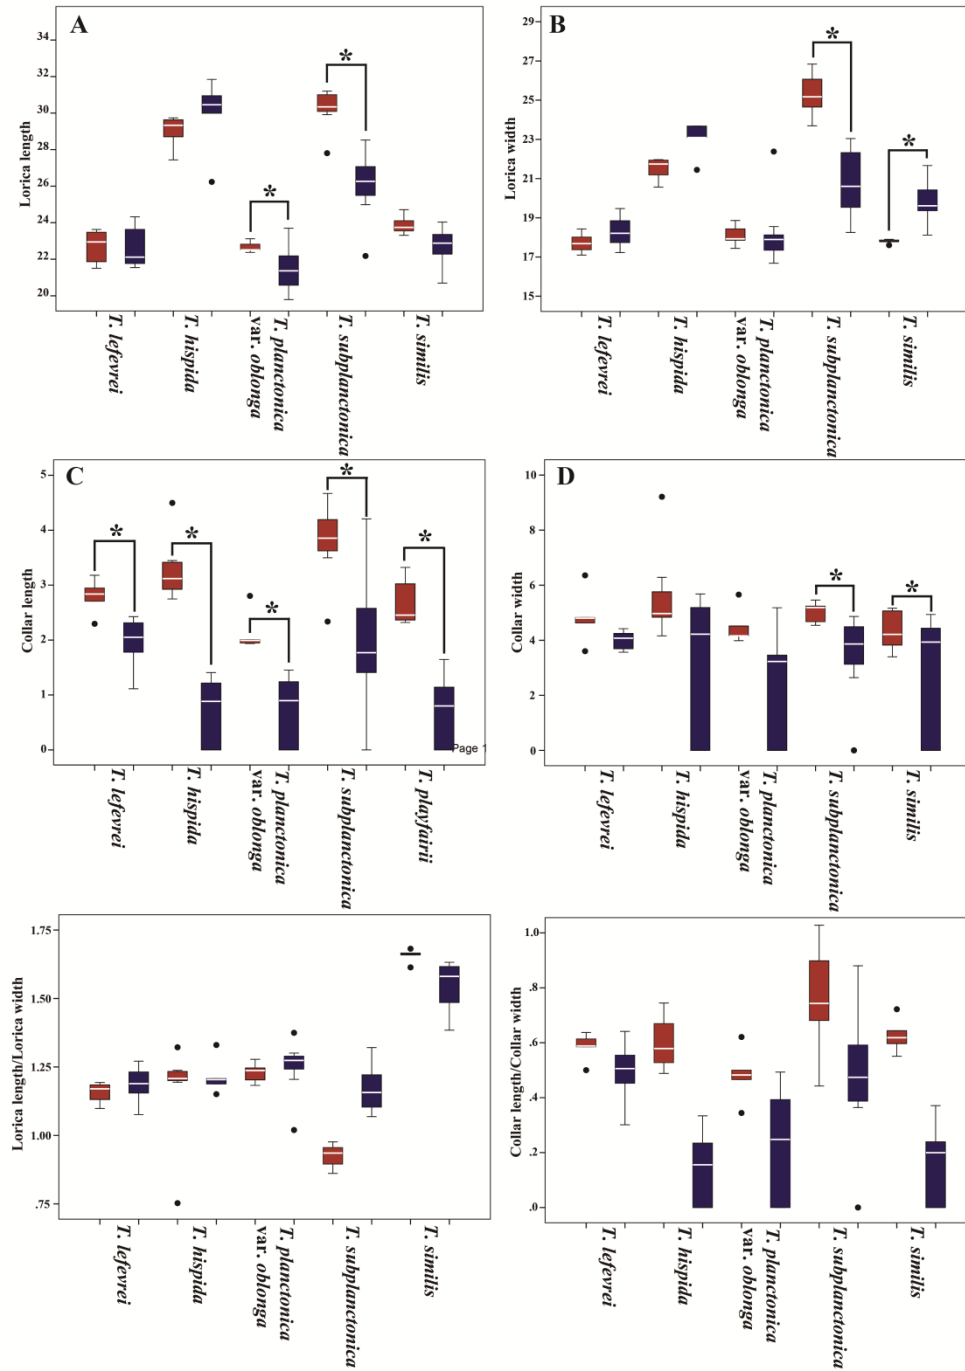

**Figure S1.** Box plot display of loricae length (A), loricae width (B), collar length (C), collar width (D), loricae length/loricae width (E) and collar length/collar width (F) of field samples (red) and cultured samples (blue). Statistically significant clusters are indicated with \* ( $P < 0.05$ ).
