# Supplementary material for: Phylogeny of Trachelomonas and Strombomonas (Euglenaceae) Based on Morphological and Molecular Data
Source: MDPI journal article supplement (doi:10.3390/d14080623), 2022-08-05
Supplement: s1 [file s1]

Table S2 Relevant sequence information downloaded from GenBank in this study, with new sequences indicated in bold type.

| Taxon                                             | Strain           | GenBank accession |                 |                 |                 |
|---------------------------------------------------|------------------|-------------------|-----------------|-----------------|-----------------|
|                                                   |                  | Nuclear SSU       | Nuclear LSU     | Plastid SSU     | Plastid LSU     |
| <i>Colacium mucronatum</i>                        | Jjockji033107A   | FJ719601          | KT304893        | FJ719645        | FJ719710        |
| <i>Colacium</i> sp.                               | Gungnamji122107J | KT304818          | KT304895        | KT305041        | KT305125        |
| <i>Colacium</i> sp.                               | MI2              | KT304819          | KT304896        | KT305042        | EF525390        |
| <i>Strombomonas acuminata</i>                     | Heontang090509C  | KT304844          | KT304965        | KT305080        | KT305172        |
| <i>Strombomonas balvayi</i>                       | cp1D             | FJ719640          | KT304970        | FJ719698        | FJ719739        |
| <i>Strombomonas borystheniensis</i>               | S10              | DQ140131          | KT304971        | FJ719699        | FJ719740        |
| <i>Strombomonas borystheniensis</i>               | SHNUQ6C2         | OM720095          | OM729580        | OM719894        | <b>ON561218</b> |
| <i>Strombomonas borystheniensis</i>               | SHNUS11B5        | <b>ON561183</b>   | <b>ON561148</b> | <b>ON561257</b> | <b>ON561219</b> |
| <i>Strombomonas borystheniensis</i>               | SHNUS14B6        | <b>ON561184</b>   | <b>ON561149</b> | <b>ON561258</b> | <b>ON561220</b> |
| <i>Strombomonas borystheniensis</i>               | SHNUS33B5        | <b>ON561185</b>   | <b>ON561150</b> | <b>ON561259</b> | <b>ON561221</b> |
| <i>Strombomonas eurystoma</i>                     | S600             | DQ140132          | KT304974        | FJ719701        | FJ719742        |
| <i>Strombomonas fluviatilis</i>                   | SHNUQ6B2         | OM720092          | OM729577        | OM719890        | <b>ON561222</b> |
| <i>Strombomonas fluviatilis</i>                   | SHNUS28B1        | <b>ON561186</b>   | <b>ON561151</b> | <b>ON561260</b> | <b>ON561223</b> |
| <i>Strombomonas gibberosa</i>                     | SHNUQ6A1         | <b>ON561187</b>   | OM729578        | OM719891        | <b>ON561224</b> |
| <i>Strombomonas maxima</i>                        | Hongseong080504  | KT304847          | KT304973        | KT305083        | EF525085        |
| <i>Strombomonas maxima</i>                        | SHNUS6A3         | OM720093          | OM729576        | OM719892        | <b>ON561225</b> |
| <i>Strombomonas ovalis</i>                        | S115             | DQ140133          | KT304975        | FJ719702        | FJ719743        |
| <i>Strombomonas ovalis</i>                        | SHNUS49C6        | <b>ON561188</b>   | <b>ON561152</b> | <b>ON561261</b> | <b>ON561226</b> |
| <i>Strombomonas</i> cf.<br><i>borystheniensis</i> | SHNUQ6C3         | <b>ON561189</b>   | <b>ON561153</b> | <b>ON561262</b> | <b>ON561227</b> |
| <i>Strombomonas triquetra</i>                     | S604             | DQ140153          | KT304978        | FJ719703        | FJ719744        |
| <i>Strombomonas triquetra</i>                     | SHNUQ6A4         | OM720094          | OM729579        | OM719893        | <b>ON561228</b> |

|                                                                     |               |                 |                 |                 |                 |
|---------------------------------------------------------------------|---------------|-----------------|-----------------|-----------------|-----------------|
| <i>Strombomonas verrucosa</i>                                       | S5c           | AF445461        | KT304979        | FJ719704        | FJ719745        |
| <i>Strombomonas verrucosa</i>                                       | SHNUS28C1     | <b>ON561190</b> | <b>ON561154</b> | <b>ON561263</b> | <b>ON561229</b> |
| <i>Trachelomonas abrupta</i>                                        | NJ T801       | DQ140134        | KT304980        | EU221507        | EF525379        |
| <i>Trachelomonas</i> sp.                                            | SHNUS12C2     | <b>ON561192</b> | <b>ON561156</b> | <b>ON561265</b> | <b>ON561231</b> |
| <i>Trachelomonas armata</i>                                         | ACOI1323      | EF999904        | KT304981        | EU221508        | KT305176        |
| <i>Trachelomonas armata</i>                                         | SHNUS50B3     | <b>ON561193</b> | <b>ON561157</b> | NONE            | <b>ON561232</b> |
| <i>Trachelomonas</i> cf. <i>bacillifera</i><br>var. <i>minima</i>   | SHNUQ4B2      | <b>ON561194</b> | <b>ON561158</b> | <b>ON561266</b> | <b>ON561233</b> |
| <i>Trachelomonas bernardinensis</i>                                 | ACOI 1103     | FJ719641        | KT304982        | EU221509        | FJ719746        |
| <i>Trachelomonas bernardinensis</i>                                 | SHNUWeijian   | <b>ON561195</b> | NONE            | <b>ON561267</b> | <b>ON561234</b> |
| <i>Trachelomonas cervicula</i>                                      | SHNUS39D1     | <b>ON561217</b> | <b>ON561182</b> | <b>ON561289</b> | <b>ON561256</b> |
| <i>Trachelomonas cingulata</i>                                      | SAG1283-21    | FJ719642        | KT304983        | FJ719705        | EF525368        |
| <i>Trachelomonas conradii</i>                                       | UTEX1313      | FJ719644        | KT304984        | FJ719709        | FJ719748        |
| <i>Trachelomonas</i> cf. <i>crebea</i>                              | SHNUS39B2     | <b>ON561196</b> | <b>ON561159</b> | <b>ON561268</b> | <b>ON561235</b> |
| <i>Trachelomonas echinata</i>                                       | SAG1283-22    | AJ532444        | KT304985        | EU221510        | EF525369        |
| <i>Trachelomonas ellipsoidalis</i>                                  | NJ T1         | DQ140135        | KT304986        | EU221511        | FJ719747        |
| <i>Trachelomonas grandis</i>                                        | SAG204.80     | AJ532446        | KT304987        | EU221512        | EF525382        |
| <i>Trachelomonas hispida</i>                                        | Jigock121309C | KT304850        | KT304989        | KT305086        | KT305177        |
| <i>Trachelomonas hispida</i>                                        | UTEX539       | FJ719643        | KT304988        | EU221513        | EF525375        |
| <i>Trachelomonas hispida</i>                                        | SHNUQ1D6      | <b>ON561199</b> | <b>ON561162</b> | <b>ON561271</b> | <b>ON561238</b> |
| <i>Trachelomonas intermedia</i>                                     | SAG205.80     | AY015002        | KT304990        | FJ719706        | EF525366        |
| <i>Trachelomonas</i> sp.                                            | SHNUS26A3     | <b>ON561200</b> | <b>ON561163</b> | <b>ON561272</b> | <b>ON561239</b> |
| <i>Trachelomonas</i> cf. <i>intermdia</i><br>var. <i>subinermis</i> | SHNUC4C3      | <b>ON561197</b> | <b>ON561160</b> | <b>ON561269</b> | <b>ON561236</b> |
| <i>Trachelomonas</i> cf. <i>intermdia</i><br>var. <i>subinermis</i> | SHNUS17C3     | <b>ON561198</b> | <b>ON561161</b> | <b>ON561270</b> | <b>ON561237</b> |

|                                                         |                |                 |                 |                 |                 |
|---------------------------------------------------------|----------------|-----------------|-----------------|-----------------|-----------------|
| <i>Trachelomonas lefevrei</i>                           | Bibong100404-5 | KT304851        | KT304992        | KT305087        | KT305178        |
| <i>Trachelomonas lefevrei</i>                           | SHNUCC         | MZ323679        | <b>ON561164</b> | MZ323685        | MZ328714        |
| <i>Trachelomonas oblonga</i>                            | NJ T516        | DQ140137        | KT304994        | EU221515        | EF525370        |
| <i>Trachelomonas pertyi</i>                             | Posudun091809D | KT304853        | KT304995        | NONE            | KT305180        |
| <i>Trachelomonas planctonica</i>                        | WT1            | DQ140138        | KT304996        | EU221516        | EF525380        |
| <i>Trachelomonas planctonica</i> var.<br><i>oblonga</i> | SHNUS2C1       | <b>ON561201</b> | <b>ON561165</b> | <b>ON561273</b> | <b>ON561240</b> |
| <i>Trachelomonas playfairii</i>                         | Kwoanam102007J | KT304854        | KT305000        | KT305089        | KT305182        |
| <i>Trachelomonas playfairii</i>                         | SHNUN14B1      | <b>ON561204</b> | <b>ON561168</b> | <b>ON561276</b> | <b>ON561243</b> |
| <i>Trachelomonas rugulosa</i>                           | TS2            | DQ140140        | KT304997        | EU221517        | EF525383        |
| <i>Trachelomonas scabra</i>                             | NJ T235        | DQ140141        | KT304998        | EU221518        | KT305181        |
| <i>Trachelomonas similis</i>                            | SHNUS28C2      | <b>ON561202</b> | <b>ON561166</b> | <b>ON561274</b> | <b>ON561241</b> |
| <i>Trachelomonas similis</i>                            | SHNUS41C3      | <b>ON561203</b> | <b>ON561167</b> | <b>ON561275</b> | <b>ON561242</b> |
| <i>Trachelomonas</i> sp.                                | SHNUC2D        | <b>ON561205</b> | <b>ON561169</b> | <b>ON561277</b> | <b>ON561244</b> |
| <i>Trachelomonas</i> sp.                                | SHNUS25D1      | <b>ON561191</b> | <b>ON561155</b> | <b>ON561264</b> | <b>ON561230</b> |
| <i>Trachelomonas</i> sp.                                | SHNUS27B5      | <b>ON561209</b> | <b>ON561173</b> | <b>ON561281</b> | <b>ON561248</b> |
| <i>Trachelomonas</i> sp                                 | SHNUS28B5      | <b>ON561210</b> | <b>ON561174</b> | <b>ON561282</b> | <b>ON561249</b> |
| <i>Trachelomonas</i> sp.                                | SHNUS4C3       | <b>ON561214</b> | <b>ON561178</b> | <b>ON561286</b> | <b>ON561253</b> |
| <i>Trachelomonas</i> sp.                                | SHNUN16B5      | <b>ON561206</b> | <b>ON561170</b> | <b>ON561278</b> | <b>ON561245</b> |
| <i>Trachelomonas</i> sp.                                | SHNUS11B6      | <b>ON561207</b> | <b>ON561171</b> | <b>ON561279</b> | <b>ON561246</b> |
| <i>Trachelomonas</i> sp.                                | SHNUS24D1      | <b>ON561208</b> | <b>ON561172</b> | <b>ON561280</b> | <b>ON561247</b> |
| <i>Trachelomonas</i> sp.                                | SHNUS36C1      | <b>ON561212</b> | <b>ON561176</b> | <b>ON561284</b> | <b>ON561251</b> |
| <i>Trachelomonas</i> sp.                                | SHNUS30A1      | <b>ON561211</b> | <b>ON561175</b> | <b>ON561283</b> | <b>ON561250</b> |
| <i>Trachelomonas</i> sp.                                | SHNUS40A5      | <b>ON561213</b> | <b>ON561177</b> | <b>ON561285</b> | <b>ON561252</b> |
| <i>Trachelomonas subplanctonica</i>                     | SHNUS17C2      | MZ323680        | <b>ON561179</b> | MZ323687        | MZ328716        |

|                                                                   |            |                 |                 |                 |                 |
|-------------------------------------------------------------------|------------|-----------------|-----------------|-----------------|-----------------|
| <i>Trachelomonas</i> cf. <i>sydneyensis</i><br>var. <i>minima</i> | SHNUC1D1   | <b>ON561215</b> | <b>ON561180</b> | <b>ON561287</b> | <b>ON561254</b> |
| <i>Trachelomonas undulaticollum</i>                               | SHNUS35D5  | <b>ON561216</b> | <b>ON561181</b> | <b>ON561288</b> | <b>ON561255</b> |
| <i>Trachelomonas volvocina</i>                                    | UTEX1327   | KT304892        | KT305039        | EU221519        | EF525373        |
| <i>Trachelomonas volvocinopsis</i>                                | SAG1283-16 | DQ140144        | KT305040        | EU221520        | EF525372        |
| <i>Trachelomonas zorensis</i>                                     | UTEX1331   | DQ140145        | KT305037        | EU221521        | EF525371        |

---
