# Supplementary material for: Phylogeny of Trachelomonas and Strombomonas (Euglenaceae) Based on Morphological and Molecular Data
Source: MDPI journal article supplement (doi:10.3390/d14080623), 2022-08-05
Supplement: s1 [file s1]

Table S1 The collection localities of strains in this study.

| Taxon                                                          | Strain      | collection locality                                                             | GPS                    |
|----------------------------------------------------------------|-------------|---------------------------------------------------------------------------------|------------------------|
| <i>Strombomonas borystheniensis</i>                            | SHNUQ6C2    | Shanghai, Pujiang Forest Park                                                   | 31°05'29"N 121°52'42"E |
|                                                                | SHNUS11B5   | Shanghai, Shangta Town                                                          | 31°12'62"N 120°92'89"E |
|                                                                | SHNUS14B6   | Shanghai, Shangta Town                                                          | 31°12'62"N 120°92'96"E |
|                                                                | SHNUS33B5   | Shanghai, Ancient Yi garden                                                     | 121.322682,31.298075   |
| <i>Strombomonas fluviatilis</i>                                | SHNUQ6B2    | Shanghai, Pujiang Forest Park                                                   | 31°05'29"N 121°52'42"E |
|                                                                | SHNUS28B1   | Jiangsu Province, Suzhou River                                                  | 31°15'47"N 121°62'56"E |
| <i>Strombomonas gibberosa</i>                                  | SHNUQ6A1    | Shanghai, Pujiang Forest Park                                                   | 31°05'29"N 121°52'42"E |
| <i>Strombomonas maxima</i>                                     | SHNUS6A3    | Shanghai, Shanghai Normal University, pond                                      | 31°16'83"N 121°42'47"E |
| <i>Strombomonas ovalis</i>                                     | SHNUS49C6   | Shanghai, Caohejing Development Zone Park                                       | 31°17'43"N 121°40'71"E |
| <i>Strombomonas</i> cf. <i>borystheniensis</i>                 | SHNUQ6C3    | Shanghai, Pujiang Forest Park                                                   | 31°05'29"N 121°52'42"E |
| <i>Strombomonas triquetra</i>                                  | SHNUQ6A4    | Shanghai, Pujiang Forest Park                                                   | 31°05'29"N 121°52'42"E |
| <i>Strombomonas verrucosa</i>                                  | SHNUS28C1   | Jiangsu Province, Suzhou River                                                  | 31°15'47"N 121°62'56"E |
| <i>Trachelomonas</i> sp.                                       | SHNUS12C2   | Shanghai, Shangta Town                                                          | 31°12'62"N 120°92'89"E |
| <i>Trachelomonas armata</i>                                    | SHNUS50B3   | Shanghai, World Exhibition Park                                                 | 31°19'24"N 121°48'73"E |
| <i>Trachelomonas</i> cf. <i>bacillifera</i> var. <i>minima</i> | SHNUQ4B2    | Heilongjiang Province, Harbin City, Hulan District, Liye street, Binshui Avenue | 45°54'17"N 126°41'26"E |
| <i>Trachelomonas bernardinensis</i>                            | SHNUWeijian | Shanghai, Pujiang Country Park                                                  | 31°14'91"N 121°37'75"E |
| <i>Trachelomonas cervicula</i>                                 | SHNUS39D1   | Shanghai, Pujiang Country Park                                                  | 31°14'91"N 121°37'75"E |
| <i>Trachelomonas</i> cf. <i>crebea</i>                         | SHNUS39B2   | Shanghai, Pujiang Country Park                                                  | 31°14'91"N 121°37'75"E |
| <i>Trachelomonas hispida</i>                                   | SHNUQ1D6    | Sichuan Province, Luzhou City                                                   | 28°89'35"N 105°44'36"E |
| <i>Trachelomonas</i> sp.                                       | SHNUS26A3   | Heilongjiang Province,                                                          | 45°54'17"N 126°41'26"E |

|                                                                        |           |                                                                                       |                        |
|------------------------------------------------------------------------|-----------|---------------------------------------------------------------------------------------|------------------------|
|                                                                        |           | Harbin City, Hulan District,<br>Liye street, Binshui Avenue                           |                        |
| <i>Trachelomonas</i> cf.<br><i>intermdia</i> var.<br><i>subinermis</i> | SHNUC4C3  | Shanghai, Qingxi Country<br>Park                                                      | 31°07'36"N 121°00'02"E |
|                                                                        | SHNUS17C3 | Shanghai, Guilin Park                                                                 | 31°17'19"N 121°42'42"E |
| <i>Trachelomonas lefevrei</i>                                          | SHNUCC    | Heilongjiang Province,<br>Harbin City, Hulan District,<br>Liye street, Binshui Avenue | 45°54'17"N 126°41'26"E |
| <i>Trachelomonas</i><br><i>planctonica</i> var. <i>oblonga</i>         | SHNUS2C1  | Shanghai, Shanghai Normal<br>University, pond                                         | 31°16'83"N 121°42'47"E |
| <i>Trachelomonas</i><br><i>playfairii</i>                              | SHNUN14B1 | Shanghai, World Exhibition<br>Park                                                    | 31°19'24"N 121°48'73"E |
|                                                                        | SHNUS28C2 | Jiangsu Province, Suzhou<br>River                                                     | 31°15'47"N 121°62'56"E |
| <i>Trachelomonas similis</i>                                           | SHNUS41C3 | Shanghai, World Exhibition<br>Park                                                    | 31°19'24"N 121°48'73"E |
|                                                                        | SHNUC2D   | Heilongjiang Province,<br>Harbin City, Hulan District,<br>Liye street, Binshui Avenue | 45°54'17"N 126°41'26"E |
|                                                                        | SHNUS27B5 | Inner Mongolia Autonomous<br>Region, Squirrel Lake                                    | 47°41'30"N 120°50'45"E |
|                                                                        | SHNUS28B5 | Jiangsu Province, Suzhou<br>River                                                     | 31°15'47"N 121°62'56"E |
|                                                                        | SHNUS4C3  | Jiangsu Province, Suzhou<br>River                                                     | 31°15'47"N 121°62'56"E |
|                                                                        | SHNUN16B5 | Shanghai, Gongqing<br>National Forest Park                                            | 31°32'69"N 121°56'04"E |
| <i>Trachelomonas</i> sp.                                               | SHNUS11B6 | Shanghai, Shangta Town                                                                | 31°12'62"N 120°92'89"E |
|                                                                        | SHNUS24D1 | Heilongjiang Province,<br>Harbin City, Hulan District,<br>Liye street, Binshui Avenue | 45°54'17"N 126°41'26"E |
|                                                                        | SHNUS36C1 | Shanghai, Pujiang Forest<br>Park                                                      | 31°05'29"N 121°52'42"E |
|                                                                        | SHNUS30A1 | Shanghai, Century park                                                                | 31°22'17"N 121°55'63"E |
|                                                                        | SHNUS40A5 | Shanghai, World Exhibition<br>Park                                                    | 31°19'24"N 121°48'73"E |
|                                                                        | SHNUS25D1 | Heilongjiang Province,<br>Harbin City, Hulan District,<br>Liye street, Binshui Avenue | 45°54'17"N 126°41'26"E |

---

|                                                                |           |                                                                                       |                        |
|----------------------------------------------------------------|-----------|---------------------------------------------------------------------------------------|------------------------|
| <i>Trachelomonas subplanctonica</i>                            | SHNUS17C2 | Shanghai, Guilin Park                                                                 | 31°17'19"N 121°42'42"E |
| <i>Trachelomonas undulaticollum</i>                            | SHNUS35D5 | Shanghai, Pujiang Country Park                                                        | 31°14'91"N 121°37'75"E |
| <i>Trachelomonas</i> cf. <i>sydneyensis</i> var. <i>minima</i> | SHNUC1D1  | Heilongjiang Province,<br>Harbin City, Hulan District,<br>Liye street, Binshui Avenue | 45°54'17"N 126°41'26"E |

---
